# Supplementary material for: Analysis of phytosterol by MALDI-TOF mass spectrometry
Source: Royal Society of Chemistry journal article supplement (doi:10.1039/c4ay00383g), 2014-01-01
Supplement: c4ay00383g1.pdf [file c4ay00383g1.pdf]

## **Analysis of phytosterol by MALDI-TOF mass spectrometry**

Yueyan Li, Miao Liang, Jinian Shu\*, Peng Zhang, and Wanqi Sun

*Research Center for Eco-Environmental Sciences, Chinese Academy of Sciences,*

*Beijing 100085, China*

---

\* Corresponding author. Phone: +86 010 6284 9508. Fax: +86 010 6292 3563. E-mail: [jshu@rcees.ac.cn](mailto:jshu@rcees.ac.cn).

## Supplementary material

Table S1. Data used for the construction of calibration curve for the  $\beta$ -sitosterol

| Concentration ( $\mu\text{M}$ ) | $I_{396}/I_{273}$ |                     |
|---------------------------------|-------------------|---------------------|
|                                 | Mean              | RSD(%) <sup>a</sup> |
| 12.08                           | 3.06              | 23.7                |
| 24.15                           | 3.40              | 20.6                |
| 120.75                          | 3.63              | 24.6                |
| 241.50                          | 4.39              | 30.9                |
| 1207.50                         | 7.92              | 23.8                |

<sup>a</sup> RSD, relative standard deviation. The relative standard deviations were obtained from 6 parallel measurements for each mass spectrum of each sample.
